# Supplementary material
Source: publisher figshare collection journal article supplement (https://diabetesjournals.figshare.com/ndownloader/files/34017695)
Supplement: Supplementary file 1 [file 34017695]

## Sheet: Sheet1
NR GENE	RSID	CHR:POS	A1	A2	FREQ(A1)	FREQ(A2)	P	OR	95% CI	BETA
HMG20A	rs1005752	15:77818128	A	C	0.7154	0.2846	2.5x10-29	1.08	1.07-1.10	0.0334238
LPL	rs10096633	8:19830921	C	T	0.8766	0.1234	1.1x10-12	1.07	1.05-1.09	0.0293838
TP53INP1	rs10097617	8:95961626	T	C	0.4847	0.4847	3.3x10-11	1.04	1.03-1.06	0.0170333
BNIPL	rs10193538	2:58981064	T	G	0.6103	0.3897	8.9x10-9	1.04	1.02-1.05	0.0170333
GRB14/COBLL1	rs10195252	2:165513091	T	C	0.5864	0.4136	6.0x10-25	1.07	1.06-1.08	0.0293838
DGKB	rs10228066	7:15063569	T	C	0.5373	0.4627	1.1x10-28	1.07	1.06-1.09	0.0293838
FAM63A	rs10305745	1:150786038	A	G	0.0145	0.0145	4.4x10-6	1.28	1.15-1.42	0.10721
PEPD	rs10406327	19:33890838	C	G	0.5226	0.4774	3.8x10-8	1.04	1.02-1.05	0.0170333
GIPR	rs10406431	19:46157019	A	G	0.5625	0.4375	9.6x10-14	1.05	1.04-1.06	0.0211893
HMGA2	rs1042725	12:66358347	T	C	0.4902	0.4902	1.8x10-13	1.05	1.03-1.06	0.0211893
ZZEF1	rs1043246	17:3828086	G	C	0.1568	0.1568	7.9x10-7	1.05	1.03-1.07	0.0211893
BCL2A	rs10469140	18:60668270	G	A	0.4849	0.4849	6.6x10-6	1.03	1.02-1.04	0.0128372
HSD17B12	rs1061810	11:43877934	A	C	0.288	0.288	6.0x10-13	1.05	1.04-1.07	0.0211893
ETS1	rs10750397	11:128234144	A	G	0.2817	0.2817	8.3x10-13	1.05	1.04-1.07	0.0211893
CDKN2A/B	rs10757283	9:22134172	T	C	0.4298	0.4298	1.7x10-41	1.11	1.09-1.13	0.045323
CDKN2A/B	rs10811660	9:22134068	G	A	0.8282	0.1718	1.4x10-115	1.27	1.24-1.29	0.103804
MTNR1B	rs10830963	11:92708710	G	C	0.2765	0.2765	4.8x10-43	1.1	1.09-1.12	0.0413927
KLHDC5	rs10842994	12:27965150	C	T	0.8054	0.1946	4.1x10-20	1.08	1.06-1.09	0.0334238
CCND2	rs10848958	12:4031104	C	T	0.8039	0.1961	1.5x10-7	1.04	1.03-1.06	0.0170333
HHEX/IDE	rs10882101	10:94462427	T	C	0.5872	0.4128	1.4x10-8	1.06	1.04-1.08	0.0253059
ETS1	rs10893829	11:128042575	T	C	0.8533	0.1467	1.3x10-10	1.06	1.04-1.08	0.0253059
HNF1B	rs10908278	17:36099952	T	A	0.4808	0.4808	6.4x10-36	1.08	1.07-1.10	0.0334238
WFS1	rs10937721	4:6306763	C	G	0.588	0.412	1.5x10-8	1.06	1.04-1.08	0.0253059
GNPDA2	rs10938398	4:45186139	A	G	0.4289	0.4289	3.6x10-12	1.05	1.03-1.06	0.0211893
PURG	rs10954772	8:30863938	T	C	0.3135	0.3135	1.8x10-9	1.04	1.03-1.06	0.0170333
HNF1B	rs10962	17:36046451	C	G	0.2257	0.2257	9.9x10-10	1.05	1.03-1.07	0.0211893
GLIS3	rs10974438	9:4291928	C	A	0.3567	0.3567	1.5x10-14	1.05	1.04-1.07	0.0211893
INS/IGF2	rs11042596	11:2118860	G	T	0.6649	0.3351	2.0x10-8	1.04	1.03-1.05	0.0170333
CCND2	rs11063028	12:4300172	C	T	0.18	0.18	8.5x10-11	1.06	1.04-1.07	0.0253059
HNF1A	rs11065299	12:121297815	A	G	0.0754	0.0754	5.8x10-7	1.06	1.04-1.09	0.0253059
LTK	rs11070332	15:41809205	A	G	0.3578	0.3578	1.1x10-13	1.05	1.04-1.06	0.0211893
HHEX/IDE	rs1112718	10:94479107	A	G	0.5984	0.4016	5.0x10-7	1.06	1.03-1.08	0.0253059
MTND2P8	rs11137820	9:81359113	C	G	0.5751	0.4249	2.9x10-8	1.04	1.02-1.05	0.0170333
PCGF3	rs111827885	4:616608	C	T	0.0156	0.0156	8.4x10-6	1.18	1.10-1.27	0.071882
PTEN	rs11202627	10:89769340	T	C	0.1518	0.1518	4.7x10-8	1.06	1.04-1.08	0.0253059
RREB1	rs112498319	6:7035734	C	A	0.4085	0.4085	4.2x10-7	1.03	1.02-1.05	0.0128372
CDC123/CAMK1D	rs11257655	10:12307894	T	C	0.2184	0.2184	1.5x10-32	1.09	1.08-1.11	0.0374265
ETS1	rs112595469	11:128583975	T	C	0.0284	0.0284	6.2x10-6	1.1	1.05-1.14	0.0413927
PTGFRN	rs1127215	1:117532790	C	T	0.5838	0.4162	1.6x10-13	1.05	1.04-1.06	0.0211893
PIM3	rs112915006	22:50604696	G	A	0.0512	0.0512	9.8x10-7	1.08	1.05-1.11	0.0334238
CRYBA2	rs113414093	2:219859171	A	G	0.0514	0.0514	6.6x10-9	1.12	1.08-1.17	0.049218
USP46	rs114447556	4:53207093	T	C	0.0839	0.0839	8.4x10-6	1.06	1.03-1.08	0.0253059
PROX1	rs114526150	1:214175531	G	T	0.0225	0.0225	4.2x10-7	1.12	1.07-1.17	0.049218
FBXL13	rs11496066	7:102486254	T	C	0.8181	0.1819	1.1x10-8	1.08	1.05-1.11	0.0334238
PAM	rs115505614	5:102422968	T	C	0.0499	0.0499	1.3x10-30	1.19	1.15-1.22	0.075547
FAM57B	rs11642430	16:30045789	G	C	0.399	0.399	2.2x10-9	1.04	1.03-1.05	0.0170333
BPTF	rs11657492	17:65648427	G	T	0.1002	0.1002	5.6x10-8	1.06	1.04-1.08	0.0253059
FAM49A	rs11680058	2:16574669	A	G	0.863	0.137	1.4x10-8	1.06	1.04-1.08	0.0253059
GLI2	rs11688682	2:121347612	G	C	0.7278	0.2722	4.2x10-9	1.05	1.03-1.06	0.0211893
GLI2	rs11688931	2:121318166	C	G	0.8494	0.1506	8.2x10-6	1.04	1.02-1.06	0.0170333
GCK	rs116913033	7:44365549	C	T	0.83	0.17	7.1x10-6	1.04	1.02-1.06	0.0170333
PTPRS	rs116953931	19:5224998	A	G	0.0371	0.0371	6.4x10-6	1.08	1.04-1.12	0.0334238
HNF4A	rs11696357	20:43233649	A	G	0.934	0.066	9.9x10-6	1.06	1.04-1.09	0.0253059
CEBPB	rs11699802	20:48832135	C	T	0.5359	0.4641	1.8x10-11	1.04	1.03-1.06	0.0170333
YWHAH	rs117001013	22:32348841	C	T	0.9117	0.0883	1.7x10-8	1.07	1.04-1.09	0.0293838
ADCY5	rs11708067	3:123065778	A	G	0.7723	0.2277	5.2x10-32	1.09	1.08-1.11	0.0374265
PPARG	rs11709077	3:12336507	G	A	0.8765	0.1235	1.8x10-36	1.14	1.11-1.16	0.0569049
IGF2BP2	rs11717959	3:185541213	G	T	0.6208	0.3792	3.0x10-6	1.04	1.02-1.06	0.0170333
TCF12	rs117483894	15:57456802	G	A	0.0369	0.0369	3.9x10-8	1.1	1.06-1.13	0.0413927
CENPW	rs11759026	6:126792095	G	A	0.2321	0.2321	2.4x10-18	1.07	1.05-1.08	0.0293838
TP53INP1	rs11786992	8:95685147	A	C	0.644	0.356	5.3x10-6	1.03	1.02-1.04	0.0128372
GPSM1	rs11793035	9:139507212	C	T	0.3311	0.3311	2.2x10-7	1.04	1.02-1.05	0.0170333
CCND1	rs11820019	11:69448758	T	C	0.9733	0.0267	5.1x10-12	1.16	1.11-1.20	0.064458
HMGB1	rs11842871	13:31042452	G	T	0.7345	0.2655	1.2x10-8	1.04	1.03-1.06	0.0170333
KIF9	rs11926707	3:46925539	C	T	0.6262	0.3738	2.1x10-8	1.27	1.17-1.38	0.103804
VEGFA	rs11967262	6:43760327	G	C	0.4855	0.4855	8.8x10-10	1.04	1.03-1.05	0.0170333
UBAP2	rs12001437	9:34074476	C	T	0.3722	0.3722	2.8x10-10	1.04	1.03-1.06	0.0170333
DSTYK	rs12048743	1:205114873	G	C	0.4417	0.4417	3.5x10-9	1.04	1.03-1.05	0.0170333
PATJ	rs12140153	1:62579891	G	T	0.9051	0.0949	1.3x10-8	1.07	1.04-1.09	0.0293838
ZNF169	rs12236906	9:97497494	T	C	0.9872	0.0128	3.4x10-6	1.15	1.08-1.22	0.0606978
BCL2A	rs12454712	18:60845884	T	C	0.6142	0.3858	4.6x10-13	1.05	1.04-1.06	0.0211893
KSR2	rs12578639	12:118489636	A	T	0.8278	0.1722	2.2x10-6	1.04	1.02-1.06	0.0170333
GCKR	rs1260326	2:27730940	C	T	0.6069	0.3931	6.5x10-25	1.07	1.06-1.08	0.0293838
LCORL	rs12640250	4:17792869	C	A	0.7149	0.2851	3.7x10-8	1.04	1.03-1.05	0.0170333
SCD5	rs12642790	4:83578271	A	G	0.3378	0.3378	4.4x10-10	1.04	1.03-1.06	0.0170333
TRHR	rs12680028	8:110123183	C	G	0.5342	0.4658	2.5x10-8	1.04	1.02-1.05	0.0170333
BOP1	rs12719778	8:145879883	T	C	0.5376	0.4624	5.0x10-9	1.04	1.03-1.05	0.0170333
INS/IGF2	rs12802972	11:1704596	A	G	0.4281	0.4281	1.5x10-6	1.03	1.02-1.05	0.0128372
FBRSL1	rs12811407	12:133069698	A	G	0.3305	0.3305	1.7x10-12	1.05	1.04-1.07	0.0211893
PRC1	rs12910825	15:91511260	G	A	0.3612	0.3612	1.6x10-15	1.05	1.04-1.07	0.0211893
SPG7	rs12920022	16:89564055	A	T	0.1575	0.1575	3.4x10-9	1.05	1.04-1.07	0.0211893
PABPC4L	rs1296328	4:137083193	A	C	0.4457	0.4457	3.5x10-8	1.04	1.02-1.05	0.0170333
GRB14/COBLL1	rs13024606	2:165573194	T	C	0.0472	0.0472	1.7x10-8	1.09	1.06-1.13	0.0374265
NKX2.2	rs13041756	20:21466795	C	T	0.1072	0.1072	1.4x10-8	1.06	1.04-1.08	0.0253059
MBNL1	rs13065698	3:152086533	A	G	0.6002	0.3998	8.1x10-13	1.05	1.03-1.06	0.0211893
SHQ1	rs13085136	3:72865183	C	T	0.9283	0.0717	1.5x10-8	1.08	1.05-1.10	0.0334238
DMGDH	rs1316776	5:78430607	C	A	0.6476	0.3524	2.6x10-12	1.05	1.03-1.06	0.0211893
ZMIZ1	rs1317617	10:81096589	G	A	0.7976	0.2024	1.8x10-6	1.04	1.02-1.06	0.0170333
ANK1	rs13262861	8:41508577	C	A	0.8292	0.1708	4.0x10-12	1.07	1.05-1.09	0.0293838
CDKN2A/B	rs1333052	9:22157908	A	C	0.6599	0.3401	6.3x10-7	1.03	1.02-1.05	0.0128372
CYTIP	rs13426680	2:158339550	A	G	0.9373	0.0627	6.7x10-10	1.09	1.06-1.11	0.0374265
SPRY2	rs1359790	13:80717156	G	A	0.7201	0.2799	2.4x10-31	1.09	1.07-1.10	0.0374265
PTPN9	rs13737	15:75932129	G	T	0.7586	0.2414	5.6x10-10	1.05	1.03-1.06	0.0211893
ZZEF1	rs1377807	17:4045440	C	G	0.3118	0.3118	4.2x10-13	1.05	1.04-1.07	0.0211893
SLCO6A1	rs138337556	5:101232944	G	A	0.0036	0.0036	4.7x10-9	1.56	1.34-1.81	0.193125
TCF7L2	rs140242150	10:114702962	A	G	0.005	0.005	2.2x10-8	1.36	1.22-1.52	0.133539
LINGO2	rs1412234	9:28410683	C	T	0.3229	0.3229	1.9x10-10	1.04	1.03-1.06	0.0170333
CDKN2A/B	rs1412830	9:22043612	C	T	0.6278	0.3722	9.1x10-8	1.04	1.02-1.05	0.0170333
PDE3B	rs141521721	11:14763828	A	C	0.0236	0.0236	2.7x10-8	1.13	1.08-1.17	0.0530784
FTO	rs1421085	16:53800954	C	T	0.415	0.415	3.1x10-84	1.13	1.12-1.15	0.0530784
WSCD2	rs1426371	12:108629780	G	A	0.7389	0.2611	8.2x10-12	1.05	1.04-1.07	0.0211893
QSER1	rs145678014	11:32927778	G	T	0.9567	0.0433	2.0x10-10	1.11	1.07-1.14	0.045323
FAM63A	rs145904381	1:151017991	T	C	0.9867	0.0133	2.6x10-8	1.19	1.12-1.26	0.075547
ANKH	rs146886108	5:14751305	C	T	0.9938	0.0062	7.8x10-13	1.41	1.28-1.55	0.149219
ANK1	rs148766658	8:41552046	C	T	0.0378	0.0378	5.7x10-7	1.09	1.05-1.13	0.0374265
CPQ	rs149364428	8:97737741	A	G	0.0104	0.0104	1.8x10-12	1.27	1.19-1.36	0.103804
NOTCH2	rs1493694	1:120526982	T	C	0.1089	0.1089	2.7x10-16	1.09	1.07-1.11	0.0374265
IGF2BP2	rs150111048	3:185514421	G	A	0.2388	0.2388	2.7x10-7	1.12	1.07-1.16	0.049218
IGF2BP2	rs1516728	3:185829891	A	T	0.759	0.241	6.3x10-6	1.03	1.02-1.05	0.0128372
PCGF3	rs1531583	4:744972	T	G	0.0458	0.0458	3.5x10-14	1.13	1.09-1.16	0.0530784
PVT1	rs1561927	8:129568078	C	T	0.2686	0.2686	1.5x10-9	1.04	1.03-1.06	0.0170333
KLF14	rs1562396	7:130457914	G	A	0.3186	0.3186	9.9x10-18	1.06	1.05-1.08	0.0253059
CDKN2A/B	rs1575972	9:22301092	T	A	0.9671	0.0329	3.1x10-7	1.1	1.06-1.14	0.0413927
SLC9B1	rs1580278	4:104140848	C	A	0.4728	0.4728	2.2x10-10	1.04	1.03-1.05	0.0170333
ATP1B2	rs1641523	17:7549681	C	T	0.4276	0.4276	1.2x10-10	1.05	1.04-1.07	0.0211893
UBE2E2	rs17013314	3:23510044	G	A	0.0313	0.0313	8.4x10-9	1.11	1.07-1.15	0.045323
JAZF1	rs1708302	7:28198677	C	T	0.5124	0.4876	1.1x10-48	1.1	1.08-1.11	0.0413927
SLC7A7	rs17122772	14:23288935	G	C	0.228	0.228	1.6x10-8	1.04	1.03-1.06	0.0170333
DGKB	rs17168486	7:14898282	T	C	0.1808	0.1808	2.3x10-17	1.07	1.06-1.09	0.0293838
ANKH	rs17250977	5:14753745	G	A	0.0376	0.0376	2.0x10-11	1.12	1.09-1.16	0.049218
ITGA1	rs17261179	5:51791225	T	C	0.5172	0.4828	1.3x10-8	1.04	1.02-1.05	0.0170333
AKAP6	rs17522122	14:33302882	T	G	0.4742	0.4742	3.2x10-9	1.04	1.03-1.05	0.0170333
WDR7	rs17684074	18:54675384	G	C	0.7403	0.2597	2.9x10-8	1.04	1.03-1.06	0.0170333
MSRA	rs17689007	8:9974824	G	A	0.5329	0.4671	2.5x10-9	1.04	1.03-1.05	0.0170333
NEUROG3	rs177045	10:71321279	G	A	0.3155	0.3155	6.6x10-18	1.07	1.05-1.08	0.0293838
CASC11	rs17772814	8:128711742	G	A	0.9151	0.0849	5.4x10-10	1.08	1.05-1.11	0.0334238
TLE4	rs17791513	9:81905590	A	G	0.9317	0.0683	3.1x10-14	1.1	1.08-1.13	0.0413927
DTNB	rs17802463	2:25643221	G	T	0.7314	0.2686	2.9x10-8	1.04	1.03-1.05	0.0170333
PPARG	rs17819328	3:12489342	G	T	0.4249	0.4249	4.8x10-16	1.06	1.04-1.07	0.0253059
MAP3K11	rs1783541	11:65294799	T	C	0.2035	0.2035	2.0x10-14	1.06	1.05-1.08	0.0253059
NRXN3	rs17836088	14:79932041	C	G	0.2171	0.2171	6.7x10-14	1.06	1.04-1.08	0.0253059
TSPAN8/LGR5	rs1796330	12:71522953	G	C	0.5711	0.4289	2.2x10-14	1.05	1.04-1.06	0.0211893
HNF1A	rs1800574	12:121416864	T	C	0.0296	0.0296	1.7x10-12	1.14	1.10-1.19	0.0569049
HNF4A	rs1800961	20:43042364	T	C	0.0353	0.0353	2.3x10-22	1.18	1.15-1.23	0.071882
WFS1	rs1801212	4:6302519	A	G	0.7087	0.2913	4.5x10-6	1.05	1.03-1.07	0.0211893
PIM3	rs1801645	22:50356850	C	T	0.275	0.275	1.5x10-8	1.04	1.02-1.05	0.0170333
TCF7L2	rs180988137	10:114751173	G	A	0.0104	0.0104	6.1x10-6	1.17	1.09-1.25	0.0681859
TCF7L2	rs184509201	10:114740337	C	G	0.9818	0.0182	1.2x10-13	1.21	1.15-1.27	0.0827854
DENND2C	rs184660829	1:115144899	C	T	0.0002	0.0002	2.5x10-8	8.05	3.86-16.8	0.905796
TP53INP1	rs187936726	8:96092422	G	A	0.0239	0.0239	5.4x10-6	1.11	1.06-1.16	0.045323
TM6SF2	rs188247550	19:19396616	T	C	0.0195	0.0195	5.2x10-6	1.15	1.08-1.22	0.0606978
FAM13A	rs1903002	4:89740894	G	C	0.5005	0.4995	2.7x10-8	1.04	1.02-1.05	0.0170333
HNF4A	rs191830490	20:43023355	G	A	0.9941	0.0059	2.2x10-6	1.24	1.13-1.36	0.0934217
FAM57B	rs199795270	16:30419384	C	G	0.0065	0.0065	1.2x10-6	1.25	1.14-1.36	0.09691
CEP68	rs2028150	2:65655012	C	G	0.5979	0.4021	2.3x10-12	1.05	1.03-1.06	0.0211893
CEP68	rs2052261	2:65355270	G	A	0.3038	0.3038	2.5x10-6	1.07	1.04-1.09	0.0293838
CDKN1B	rs2066827	12:12871099	G	T	0.235	0.235	4.2x10-8	1.05	1.03-1.06	0.0211893
USP46	rs2102278	4:52818664	G	A	0.3186	0.3186	3.7x10-8	1.04	1.02-1.05	0.0170333
HNF1B	rs2189301	17:36063685	G	A	0.8716	0.1284	6.5x10-8	1.05	1.03-1.08	0.0211893
USP44	rs2197973	12:95928560	T	C	0.5375	0.4625	3.6x10-8	1.04	1.02-1.05	0.0170333
HMGA1	rs2233632	6:34524698	T	C	0.6882	0.3118	5.3x10-7	1.04	1.03-1.06	0.0170333
KCNQ1	rs2237895	11:2857194	C	A	0.426	0.426	6.0x10-52	1.12	1.11-1.14	0.049218
KCNQ1	rs2237897	11:2858546	C	T	0.9543	0.0457	8.4x10-32	1.23	1.19-1.27	0.0899051
GIPR	rs2238689	19:46178661	C	T	0.4177	0.4177	5.4x10-9	1.04	1.03-1.05	0.0170333
CEP68	rs2249105	2:65287896	A	G	0.6343	0.3657	2.2x10-14	1.1	1.08-1.13	0.0413927
HMGA2	rs2258238	12:66221060	T	A	0.1042	0.1042	4.5x10-21	1.1	1.08-1.13	0.0413927
RALY	rs2268078	20:32596704	A	G	0.6572	0.3428	2.3x10-10	1.04	1.03-1.06	0.0170333
KLF14	rs2268382	7:130027037	C	A	0.3271	0.3271	7.4x10-6	1.03	1.02-1.04	0.0128372
ROBO2	rs2272163	3:77671721	C	A	0.6184	0.3816	9.6x10-9	1.04	1.02-1.05	0.0170333
PLEKHA1	rs2280141	10:124193181	T	G	0.5161	0.4839	1.4x10-13	1.05	1.03-1.06	0.0211893
KCNQ1	rs2283164	11:2579163	A	G	0.9468	0.0532	1.2x10-7	1.08	1.05-1.12	0.0334238
KCNQ1	rs2283220	11:2755548	A	G	0.6896	0.3104	1.4x10-9	1.05	1.03-1.06	0.0211893
POC5	rs2307111	5:75003678	T	C	0.6053	0.3947	2.1x10-16	1.05	1.04-1.07	0.0211893
KCNQ1	rs231349	11:2672821	T	C	0.1024	0.1024	2.3x10-11	1.07	1.05-1.10	0.0293838
KCNQ1	rs231361	11:2691500	A	G	0.2564	0.2564	5.0x10-25	1.08	1.07-1.10	0.0334238
KCNQ1	rs234853	11:2850828	G	A	0.2482	0.2482	6.8x10-16	1.08	1.06-1.10	0.0334238
BCL11A	rs243024	2:60583665	A	G	0.4599	0.4599	2.5x10-20	1.06	1.05-1.07	0.0253059
ANKRD55	rs2431115	5:55848669	A	G	0.4015	0.4015	3.9x10-10	1.04	1.03-1.06	0.0170333
PHF15	rs244665	5:133414622	A	G	0.7028	0.2972	9.9x10-6	1.03	1.02-1.05	0.0128372
ONECUT1	rs2456530	15:53091553	T	C	0.1272	0.1272	5.4x10-9	1.06	1.04-1.08	0.0253059
TFAP2B	rs2465043	6:51180765	G	A	0.6441	0.3559	2.9x10-6	1.03	1.02-1.04	0.0128372
RFT1	rs2581787	3:53127677	T	G	0.5634	0.4366	2.4x10-8	1.04	1.02-1.05	0.0170333
NEUROG3	rs2642588	10:71466578	G	T	0.7016	0.2984	2.2x10-14	1.05	1.04-1.07	0.0211893
ACE	rs2727301	17:61965043	T	C	0.7538	0.2462	1.3x10-6	1.04	1.02-1.05	0.0170333
PDHX	rs2767036	11:34982148	C	A	0.2908	0.2908	3.3x10-8	1.04	1.02-1.05	0.0170333
TLE1	rs2796441	9:84308948	G	A	0.5924	0.4076	4.4x10-24	1.07	1.05-1.08	0.0293838
ARL15	rs279744	5:53412620	C	A	0.6909	0.3091	3.1x10-8	1.04	1.03-1.05	0.0170333
SOGA3	rs2800733	6:127416930	A	G	0.7165	0.2835	6.0x10-11	1.05	1.03-1.06	0.0211893
LYPLAL1	rs2820446	1:219748818	C	G	0.7055	0.2945	3.3x10-16	1.06	1.04-1.07	0.0253059
GPSM1	rs28505901	9:139241030	G	A	0.752	0.248	6.7x10-26	1.09	1.07-1.11	0.0374265
THADA	rs28525376	2:43207872	G	T	0.4216	0.4216	2.7x10-6	1.03	1.02-1.04	0.0128372
HNF1A	rs28638142	12:121501461	A	C	0.0442	0.0442	2.9x10-6	1.08	1.04-1.11	0.0334238
PDHX	rs286925	11:34642668	A	G	0.1815	0.1815	5.0x10-6	1.04	1.02-1.06	0.0170333
TCF4	rs28719468	18:53452144	C	T	0.1586	0.1586	1.9x10-6	1.04	1.02-1.06	0.0170333
ABCC5	rs2872246	3:183738460	A	C	0.4538	0.4538	1.5x10-8	1.04	1.02-1.05	0.0170333
PDGFC	rs28819812	4:157652753	C	A	0.6767	0.3233	2.2x10-8	1.04	1.03-1.06	0.0170333
DGKB	rs2908334	7:15206239	T	C	0.6308	0.3692	5.9x10-6	1.03	1.02-1.04	0.0128372
GNG4	rs291367	1:235690800	G	A	0.6322	0.3678	4.7x10-10	1.04	1.03-1.06	0.0170333
CMIP	rs2925979	16:81534790	T	C	0.2996	0.2996	1.4x10-14	1.05	1.04-1.07	0.0211893
IRS1	rs2972144	2:227101411	G	A	0.6385	0.3615	2.1x10-46	1.1	1.08-1.11	0.0413927
MIR3668	rs2982521	6:139835329	A	T	0.38	0.38	1.3x10-9	1.05	1.03-1.06	0.0211893
FARSA	rs3111316	19:13038415	A	G	0.5885	0.4115	6.3x10-13	1.05	1.03-1.06	0.0211893
BCAR1	rs3115960	16:75516534	G	C	0.37	0.37	2.8x10-6	1.03	1.02-1.05	0.0128372
CCND2	rs3217792	12:4384696	C	T	0.9131	0.0869	2.6x10-21	1.12	1.10-1.15	0.049218
CCND2	rs3217860	12:4399050	G	A	0.258	0.258	3.9x10-9	1.05	1.03-1.06	0.0211893
PHF15	rs329122	5:133864599	A	G	0.4286	0.4286	3.6x10-9	1.04	1.03-1.05	0.0170333
PROX1	rs340874	1:214159256	C	T	0.5555	0.4445	1.6x10-22	1.07	1.05-1.08	0.0293838
LRFN2	rs34298980	6:40409243	T	C	0.4967	0.4967	9.3x10-10	1.04	1.03-1.05	0.0170333
TSHZ2	rs34454109	20:51223594	A	T	0.7709	0.2291	7.1x10-9	1.04	1.03-1.06	0.0170333
RNF6	rs34584161	13:26776999	A	G	0.7598	0.2402	2.2x10-10	1.05	1.03-1.06	0.0211893
RASGRP1	rs34715063	15:38873115	C	T	0.1235	0.1235	2.3x10-19	1.1	1.07-1.12	0.0413927
ABCB10	rs348330	1:229672955	G	A	0.3605	0.3605	2.7x10-14	1.05	1.04-1.07	0.0211893
MLX	rs34855406	17:40731411	C	G	0.2772	0.2772	2.3x10-12	1.05	1.04-1.07	0.0211893
TCF7L2	rs34855922	10:114871594	A	G	0.7162	0.2838	5.5x10-12	1.05	1.04-1.07	0.0211893
KSR2	rs34965774	12:118412373	A	G	0.1438	0.1438	2.0x10-9	1.06	1.04-1.08	0.0253059
UBE2E2	rs35352848	3:23455582	T	C	0.7878	0.2122	1.3x10-17	1.07	1.05-1.09	0.0293838
MBNL1	rs35497231	3:152433628	C	T	0.3169	0.3169	7.6x10-8	1.04	1.02-1.05	0.0170333
PCGF3	rs35654957	4:1010077	C	T	0.367	0.367	4.2x10-7	1.03	1.02-1.05	0.0128372
TTLL6	rs35895680	17:47060322	C	A	0.678	0.322	2.5x10-15	1.06	1.04-1.07	0.0253059
TMEM18	rs35913461	2:653575	C	T	0.8291	0.1709	1.6x10-11	1.06	1.04-1.08	0.0253059
PABPC1P2	rs35999103	2:147861633	T	C	0.1547	0.1547	9.7x10-9	1.05	1.03-1.07	0.0211893
HTT	rs362307	4:3241845	T	C	0.0768	0.0768	1.1x10-9	1.08	1.05-1.10	0.0334238
CLUAP1	rs3751837	16:3583173	T	C	0.22	0.22	1.4x10-8	1.04	1.03-1.06	0.0170333
MACF1	rs3768321	1:40035928	T	G	0.2004	0.2004	2.6x10-26	1.09	1.07-1.10	0.0374265
RBMS1	rs3772071	2:161135544	T	C	0.7135	0.2865	1.2x10-11	1.05	1.03-1.06	0.0211893
PSMD6	rs3774723	3:63962339	G	A	0.8442	0.1558	1.6x10-13	1.07	1.05-1.09	0.0293838
TFAP2B	rs3798519	6:50788778	C	A	0.1844	0.1844	2.6x10-12	1.06	1.04-1.08	0.0253059
SLC30A8	rs3802177	8:118185025	G	A	0.6851	0.3149	1.1x10-55	1.11	1.10-1.13	0.045323
ZC3H4	rs3810291	19:47569003	A	G	0.673	0.327	8.9x10-12	1.05	1.03-1.06	0.0211893
ITGA1	rs3811978	5:52100489	G	A	0.1668	0.1668	7.7x10-11	1.06	1.04-1.07	0.0253059
ZZEF1	rs3826482	17:3860356	A	T	0.5756	0.4244	2.1x10-7	1.03	1.02-1.05	0.0128372
ANKH	rs3845281	5:14610134	G	A	0.9039	0.0961	2.3x10-11	1.08	1.06-1.10	0.0334238
ST6GAL1	rs3887925	3:186665645	T	C	0.5468	0.4532	3.1x10-22	1.07	1.05-1.08	0.0293838
RELN	rs39328	7:103444978	T	C	0.4334	0.4334	3.7x10-8	1.04	1.02-1.05	0.0170333
EBF1	rs3934712	5:157928196	C	T	0.2057	0.2057	3.2x10-8	1.05	1.03-1.07	0.0211893
NEUROG3	rs41277236	10:71332301	T	C	0.0431	0.0431	1.5x10-6	1.09	1.05-1.12	0.0374265
MPHOSPH9	rs4148856	12:123450765	C	G	0.7814	0.2186	1.7x10-10	1.05	1.03-1.07	0.0211893
CCND2	rs4238013	12:4376089	C	T	0.2087	0.2087	3.2x10-11	1.06	1.04-1.07	0.0253059
IGF2BP3	rs4279506	7:23512896	G	C	0.6102	0.3898	4.8x10-8	1.06	1.04-1.08	0.0253059
FTO	rs4281707	16:53501946	G	A	0.5442	0.4558	3.2x10-10	1.04	1.03-1.05	0.0170333
TOMM40/APOE	rs429358	19:45411941	T	C	0.8458	0.1542	2.6x10-18	1.08	1.06-1.10	0.0334238
KCNQ1	rs445084	11:2908754	G	A	0.3613	0.3613	1.7x10-6	1.03	1.02-1.05	0.0128372
ZBED3	rs4457053	5:76424949	G	A	0.3036	0.3036	8.4x10-18	1.06	1.05-1.08	0.0253059
ANKRD55	rs465002	5:55808475	T	C	0.7421	0.2579	6.1x10-38	1.11	1.09-1.12	0.045323
LPP	rs4686471	3:187740899	C	T	0.6104	0.3896	1.7x10-20	1.06	1.05-1.08	0.0253059
RBM6	rs4688760	3:49980596	T	C	0.6842	0.3158	3.5x10-10	1.04	1.03-1.06	0.0170333
QKI	rs4709746	6:164133001	C	T	0.8676	0.1324	5.8x10-9	1.06	1.04-1.08	0.0253059
ANK1	rs4736819	8:41509915	T	C	0.5537	0.4463	5.4x10-7	1.04	1.02-1.05	0.0170333
SLC22A3	rs474513	6:160770312	A	G	0.5169	0.4831	8.1x10-10	1.04	1.03-1.05	0.0170333
IRS2	rs4771648	13:110431626	G	A	0.6685	0.3315	8.9x10-8	1.04	1.02-1.05	0.0170333
MAP2K5	rs4776970	15:68080886	A	T	0.6406	0.3594	5.0x10-9	1.04	1.03-1.05	0.0170333
MAP2K7	rs4804833	19:7970635	A	G	0.3902	0.3902	7.7x10-13	1.05	1.03-1.06	0.0211893
HNF4A	rs4810426	20:43001721	T	C	0.1064	0.1064	3.1x10-17	1.09	1.07-1.12	0.0374265
METTL15	rs4923543	11:28534898	A	G	0.332	0.332	4.5x10-8	1.04	1.03-1.06	0.0170333
RAI1	rs4925109	17:17661802	A	G	0.3164	0.3164	2.8x10-12	1.05	1.03-1.06	0.0211893
INS/IGF2	rs4929965	11:2197286	A	G	0.3829	0.3829	4.0x10-26	1.07	1.06-1.09	0.0293838
KCNQ1	rs4930091	11:2372356	C	T	0.7594	0.2406	3.7x10-6	1.04	1.02-1.05	0.0170333
AP3S2	rs4932265	15:90423293	T	C	0.2672	0.2672	4.2x10-20	1.07	1.05-1.08	0.0293838
BEND3	rs4946812	6:107431688	G	A	0.6743	0.3257	8.2x10-9	1.04	1.03-1.05	0.0170333
PIK3R1	rs4976033	5:67714246	G	A	0.4105	0.4105	1.0x10-9	1.05	1.03-1.06	0.0211893
BOP1	rs4977213	8:145507304	C	T	0.3749	0.3749	9.1x10-14	1.05	1.04-1.07	0.0211893
ABO	rs505922	9:136149229	C	T	0.3317	0.3317	3.9x10-12	1.05	1.03-1.06	0.0211893
GLIS3	rs510807	9:3965689	A	C	0.4906	0.4906	1.4x10-6	1.03	1.02-1.04	0.0128372
KCNJ11	rs5213	11:17408404	C	T	0.3624	0.3624	3.5x10-27	1.07	1.06-1.09	0.0293838
MC4R	rs523288	18:57848369	T	A	0.2377	0.2377	7.6x10-13	1.05	1.04-1.07	0.0211893
WDR72	rs528350911	15:53747228	G	C	0.0068	0.0068	2.1x10-8	1.27	1.17-1.38	0.103804
GIPR	rs533172266	19:46351837	T	C	0.0006	0.0006	3.7x10-6	2.33	1.63-3.33	0.367356
TCF7L2	rs536643418	10:114699835	G	C	0.0052	0.0052	2.6x10-8	1.5	1.30-1.73	0.176091
SEC16B	rs539515	1:177889025	C	A	0.1981	0.1981	1.6x10-10	1.05	1.04-1.07	0.0211893
LTK	rs543786825	15:42201410	T	C	0.0004	0.0004	4.7x10-6	3.15	1.93-5.15	0.498311
INS/IGF2	rs555759341	11:2151761	C	G	0.0049	0.0049	3.6x10-8	1.38	1.23-1.55	0.139879
ZNF169	rs55653563	9:97001682	A	C	0.7321	0.2679	2.2x10-9	1.04	1.03-1.06	0.0170333
RMST	rs557027608	12:97779248	A	G	0.0006	0.0006	2.7x10-7	2.34	1.69-3.24	0.369216
BPTF	rs558308082	17:65820153	C	G	0.0008	0.0008	6.6x10-6	2.04	1.49-2.77	0.30963
TMCC1	rs559138871	3:129470067	T	C	0.002	0.002	7.3x10-6	1.49	1.25-1.77	0.173186
EYA2	rs560716466	20:45317678	A	G	0.0031	0.0031	9.8x10-6	1.36	1.19-1.56	0.133539
MAEA	rs56337234	4:1784403	C	T	0.5026	0.4974	8.6x10-18	1.06	1.04-1.07	0.0253059
HNF1A	rs56348580	12:121432117	G	C	0.6889	0.3111	2.3x10-13	1.05	1.04-1.07	0.0211893
FBXL13	rs56376556	7:102038318	T	C	0.0533	0.0533	1.7x10-6	1.08	1.04-1.11	0.0334238
KIF2B	rs569511541	17:52140805	G	A	0.0002	0.0002	1.5x10-8	7.63	3.78-15.4	0.882525
MTNR1B	rs57235767	11:93013531	C	T	0.7057	0.2943	5.9x10-10	1.04	1.03-1.06	0.0170333
XKR6	rs57327348	8:10808687	A	T	0.782	0.218	4.5x10-8	1.04	1.02-1.06	0.0170333
EP300	rs5758223	22:41489920	A	G	0.7167	0.2833	3.8x10-8	1.04	1.03-1.05	0.0170333
KL	rs576674	13:33554302	G	A	0.1694	0.1694	8.3x10-10	1.05	1.04-1.07	0.0211893
FAF1	rs58432198	1:51256091	C	T	0.8811	0.1189	2.1x10-10	1.07	1.05-1.09	0.0293838
ACSL1	rs58730668	4:185717759	T	C	0.858	0.142	1.3x10-13	1.07	1.05-1.09	0.0293838
TCEA2	rs59944054	20:62693175	A	G	0.2382	0.2382	1.5x10-8	1.06	1.04-1.08	0.0253059
ZBTB46	rs6011155	20:62450664	T	C	0.6297	0.3703	6.3x10-6	1.04	1.02-1.05	0.0170333
MHC	rs601945	6:32573415	G	A	0.1775	0.1775	4.7x10-8	1.06	1.04-1.08	0.0253059
ACE	rs60276348	17:62203304	T	C	0.1397	0.1397	2.6x10-8	1.05	1.03-1.07	0.0211893
EYA2	rs6063048	20:45598564	G	A	0.7246	0.2754	2.2x10-11	1.05	1.03-1.06	0.0211893
GNAS	rs6070625	20:57394628	G	C	0.5174	0.4826	5.3x10-14	1.05	1.04-1.06	0.0211893
MIR3668	rs616279	6:140249466	A	G	0.7379	0.2621	6.7x10-7	1.04	1.03-1.06	0.0170333
BPTF	rs61676547	17:65892507	C	G	0.1924	0.1924	2.9x10-11	1.06	1.04-1.07	0.0253059
NEUROG3	rs61850200	10:71321658	C	G	0.2768	0.2768	7.3x10-6	1.04	1.02-1.05	0.0170333
CCND1	rs61881115	11:68997225	G	A	0.838	0.162	4.1x10-7	1.05	1.03-1.06	0.0211893
MARK3	rs62007683	14:103894071	G	T	0.6532	0.3468	3.1x10-8	1.04	1.02-1.05	0.0170333
ATP1B2	rs62059712	17:7740170	T	C	0.9184	0.0816	4.9x10-6	1.07	1.04-1.10	0.0293838
COMMD9	rs62080313	18:36278709	C	T	0.1233	0.1233	1.0x10-8	1.06	1.04-1.08	0.0253059
TMEM18	rs62107261	2:422144	T	C	0.9536	0.0464	3.8x10-12	1.12	1.08-1.15	0.049218
TSC22D2	rs62271373	3:150066540	A	T	0.0553	0.0553	1.0x10-9	1.09	1.06-1.12	0.0374265
ITGA1	rs62357230	5:52315682	A	G	0.0339	0.0339	5.9x10-6	1.09	1.05-1.13	0.0374265
MRPS30	rs62368490	5:44534364	T	C	0.0313	0.0313	3.4x10-6	1.1	1.06-1.14	0.0413927
ARL15	rs62370480	5:52774510	A	G	0.2195	0.2195	2.0x10-6	1.04	1.02-1.05	0.0170333
RELN	rs62482405	7:102987583	G	T	0.0819	0.0819	6.9x10-6	1.05	1.03-1.08	0.0211893
AOC1	rs62492368	7:150537635	A	G	0.3081	0.3081	1.1x10-10	1.05	1.03-1.06	0.0211893
VEGFA	rs6458354	6:43814190	C	T	0.289	0.289	2.1x10-12	1.05	1.04-1.07	0.0211893
MNX1	rs6459733	7:156930550	G	C	0.6729	0.3271	2.4x10-17	1.06	1.05-1.07	0.0253059
SLC12A8	rs649961	3:124926637	T	C	0.4651	0.4651	9.9x10-10	1.04	1.03-1.05	0.0170333
MTMR3/ASCC2	rs6518681	22:30609554	G	A	0.9136	0.0864	1.1x10-12	1.09	1.06-1.11	0.0374265
BNIPL	rs6545714	2:59307725	G	A	0.392	0.392	8.9x10-9	1.04	1.02-1.05	0.0170333
ITFG3	rs6600191	16:295795	T	C	0.8246	0.1754	9.3x10-13	1.06	1.05-1.08	0.0253059
GLI2	rs66477705	2:121378852	T	C	0.967	0.033	2.6x10-6	1.09	1.05-1.13	0.0374265
THADA	rs6708643	2:43430440	A	G	0.5007	0.4993	3.9x10-8	1.04	1.02-1.05	0.0170333
ETS1	rs67232546	11:128398938	T	C	0.207	0.207	1.3x10-11	1.06	1.04-1.07	0.0253059
KCNJ11	rs67254669	11:17470143	G	A	0.0011	0.0011	1.1x10-8	1.89	1.52-2.35	0.276462
IGF2BP2	rs6780171	3:185503456	A	T	0.3138	0.3138	9.0x10-56	1.14	1.12-1.16	0.0569049
SMARCAD1	rs6821438	4:95091911	A	G	0.5342	0.4658	4.0x10-11	1.04	1.03-1.06	0.0170333
MRPS30	rs6884702	5:44682589	G	A	0.3932	0.3932	1.5x10-10	1.04	1.03-1.06	0.0170333
ANKH	rs6885132	5:14768092	C	G	0.904	0.096	1.7x10-8	1.07	1.04-1.09	0.0293838
CTTNBP2	rs6976111	7:117495667	A	C	0.3127	0.3127	1.2x10-8	1.04	1.03-1.06	0.0170333
HAUS6	rs7022807	9:19067833	G	A	0.4014	0.4014	2.7x10-10	1.04	1.03-1.05	0.0170333
ARL15	rs702634	5:53271420	A	G	0.69	0.31	7.7x10-14	1.05	1.04-1.07	0.0211893
ZMIZ1	rs703972	10:80952826	G	C	0.533	0.467	1.7x10-29	1.07	1.06-1.09	0.0293838
HHEX/IDE	rs7078559	10:93924663	T	C	0.5783	0.4217	4.1x10-7	1.03	1.02-1.05	0.0128372
CRY2	rs7115753	11:45912013	A	G	0.4494	0.4494	3.8x10-9	1.04	1.03-1.05	0.0170333
CELF1	rs7124681	11:47529947	A	C	0.4097	0.4097	5.1x10-9	1.04	1.03-1.05	0.0170333
NF1	rs71372253	17:29413019	C	T	0.0642	0.0642	4.4x10-8	1.08	1.05-1.10	0.0334238
USP3	rs7178762	15:63871292	C	T	0.4595	0.4595	5.4x10-10	1.04	1.03-1.05	0.0170333
ITPR2	rs718314	12:26453283	G	A	0.2532	0.2532	8.4x10-11	1.05	1.03-1.06	0.0211893
GLP2R	rs7222481	17:9785187	C	G	0.3238	0.3238	1.4x10-8	1.04	1.03-1.05	0.0170333
LAMA1	rs7240767	18:7070642	C	T	0.3762	0.3762	1.6x10-8	1.04	1.02-1.05	0.0170333
UHRF1	rs7249758	19:4948862	A	G	0.2039	0.2039	3.4x10-9	1.05	1.03-1.07	0.0211893
WDR11	rs72631105	10:122915345	A	G	0.1899	0.1899	3.7x10-9	1.06	1.04-1.08	0.0253059
BCAR1	rs72802342	16:75234872	C	A	0.9231	0.0769	4.0x10-32	1.17	1.14-1.20	0.0681859
TCF4	rs72926932	18:53050646	C	A	0.0839	0.0839	1.0x10-14	1.09	1.07-1.12	0.0374265
HNF1A	rs73224262	12:121882395	T	C	0.0068	0.0068	9.1x10-7	1.24	1.14-1.34	0.0934217
HNF1A	rs73226260	12:121380541	G	A	0.9669	0.0331	5.9x10-11	1.13	1.09-1.17	0.0530784
PNPLA3	rs738408	22:44324730	T	C	0.2261	0.2261	1.4x10-10	1.05	1.03-1.07	0.0211893
PSMD6	rs74368513	3:64460694	G	A	0.9956	0.0044	7.0x10-6	1.31	1.16-1.47	0.117271
MC4R	rs74452128	18:58056566	C	A	0.9763	0.0237	1.0x10-9	1.15	1.10-1.20	0.0606978
MBNL1	rs74653713	3:152417881	C	A	0.9571	0.0429	1.2x10-8	1.1	1.06-1.13	0.0413927
INSR	rs75253922	19:7240848	C	T	0.1909	0.1909	2.7x10-8	1.05	1.03-1.06	0.0211893
KIF9	rs75423501	3:47242923	G	A	0.1007	0.1007	7.5x10-6	1.05	1.03-1.08	0.0211893
CDKN2A/B	rs76011118	9:22133773	A	G	0.0341	0.0341	1.4x10-7	1.11	1.07-1.15	0.045323
TCF4	rs76197067	18:52604955	G	A	0.0005	0.0005	8.1x10-6	2.68	1.74-4.12	0.428135
SRGAP2D	rs76251711	13:59184234	G	A	0.0126	0.0126	2.3x10-6	1.16	1.09-1.23	0.064458
CACNA2D3	rs76263492	3:54828827	T	G	0.0452	0.0452	6.3x10-9	1.09	1.06-1.13	0.0374265
EGFEM1P	rs7629630	3:168218841	A	T	0.8567	0.1433	2.5x10-8	1.05	1.03-1.07	0.0211893
ST6GAL1	rs7645517	3:186675277	A	G	0.0576	0.0576	2.5x10-8	1.08	1.05-1.11	0.0334238
ANKH	rs76549217	5:14768766	T	C	0.0295	0.0295	3.0x10-10	1.14	1.10-1.19	0.0569049
TMEM154	rs7669833	4:153513369	T	A	0.7045	0.2955	1.2x10-14	1.06	1.04-1.07	0.0253059
HNF4A	rs76811102	20:42905415	T	C	0.0424	0.0424	1.1x10-7	1.09	1.06-1.13	0.0374265
CCND2	rs76895963	12:4384844	T	G	0.9802	0.0198	1.4x10-69	1.62	1.54-1.71	0.209515
HMGA1	rs77136196	6:34247047	T	C	0.042	0.042	1.6x10-8	1.11	1.07-1.16	0.045323
RASA1	rs7719891	5:86577352	G	A	0.2585	0.2585	2.4x10-8	1.04	1.03-1.06	0.0170333
CENTD2/ARAP1	rs77464186	11:72460398	A	C	0.8363	0.1637	4.7x10-33	1.11	1.09-1.13	0.045323
CDKAL1	rs7756992	6:20679709	G	A	0.2735	0.2735	2.4x10-88	1.15	1.13-1.17	0.0606978
RMST	rs77864822	12:97848775	A	G	0.9324	0.0676	1.1x10-8	1.08	1.05-1.11	0.0334238
FTO	rs78020297	16:53758720	A	G	0.0517	0.0517	6.5x10-9	1.09	1.06-1.12	0.0374265
TCF7L2	rs78025551	10:114757956	C	G	0.851	0.149	1.6x10-7	1.05	1.03-1.07	0.0211893
GPSM1	rs78403475	9:139235606	G	C	0.8956	0.1044	1.2x10-6	1.06	1.03-1.08	0.0253059
PAM	rs78408340	5:102338739	G	C	0.0083	0.0083	2.1x10-24	1.47	1.37-1.59	0.167317
FOCAD	rs7847880	9:20662703	C	T	0.8431	0.1569	2.1x10-6	1.04	1.03-1.06	0.0170333
FOCAD	rs7867635	9:20241069	C	T	0.4123	0.4123	4.0x10-8	1.04	1.02-1.05	0.0170333
IGF2BP3	rs78840640	7:23434606	G	C	0.022	0.022	2.8x10-6	1.11	1.06-1.16	0.045323
TCF7L2	rs7903146	10:114758349	T	C	0.295	0.2951	5.8x10-447	1.37	1.35-1.39	0.136721
TMEM127	rs79046683	2:96913918	T	G	0.0048	0.0048	3.0x10-8	2.34	1.73-3.16	0.369216
GLIS3	rs79103584	9:4243045	T	A	0.9862	0.0138	4.4x10-6	1.14	1.08-1.21	0.0569049
TCF7L2	rs7918400	10:114703136	T	C	0.4761	0.4761	2.0x10-15	1.06	1.04-1.07	0.0253059
QSER1	rs7943101	11:32460873	T	C	0.1614	0.1614	8.5x10-6	1.04	1.02-1.06	0.0170333
PROX1	rs79687284	1:214150821	C	G	0.0348	0.0348	2.6x10-16	1.16	1.12-1.21	0.064458
ZNF664	rs7978610	12:124468572	G	C	0.6655	0.3345	2.0x10-8	1.27	1.17-1.38	0.103804
IRS2	rs7987740	13:109947213	T	C	0.6094	0.3906	4.0x10-8	1.04	1.02-1.05	0.0170333
KCNQ1	rs80102379	11:2634177	G	T	0.9822	0.0178	9.3x10-8	1.15	1.09-1.21	0.0606978
SMEK1	rs8010382	14:91963722	G	A	0.4214	0.4214	6.5x10-9	1.04	1.03-1.05	0.0170333
THADA	rs80147536	2:43698028	A	T	0.9043	0.0957	2.7x10-29	1.13	1.11-1.16	0.0530784
CLEC14A	rs8017808	14:38848419	G	T	0.7431	0.2569	2.1x10-8	1.04	1.03-1.06	0.0170333
SLC30A8	rs80244329	8:118404672	G	A	0.9781	0.0219	6.9x10-6	1.11	1.06-1.17	0.045323
RASGRP1	rs8032939	15:38834033	C	T	0.246	0.246	3.5x10-14	1.06	1.04-1.07	0.0253059
C2CD4A/B	rs8037894	15:62394264	G	C	0.5663	0.4337	2.6x10-13	1.05	1.03-1.06	0.0211893
ATP2A1	rs8046545	16:28915217	G	A	0.3589	0.3589	1.9x10-8	1.04	1.02-1.05	0.0170333
TM6SF2	rs8107974	19:19388500	T	A	0.0769	0.0769	3.3x10-15	1.1	1.07-1.12	0.0413927
ZNF664	rs825452	12:124509177	A	G	0.6031	0.3969	2.4x10-6	1.04	1.02-1.05	0.0170333
GNAS	rs862016	20:57551099	G	A	0.0783	0.0783	1.1x10-7	1.07	1.04-1.09	0.0293838
NFAT5	rs862320	16:69651866	C	T	0.5783	0.4217	3.9x10-11	1.04	1.03-1.06	0.0170333
GCK	rs878521	7:44255643	A	G	0.2451	0.2451	1.9x10-13	1.06	1.04-1.07	0.0253059
CRHR2	rs917195	7:30728452	C	T	0.77	0.23	4.2x10-11	1.05	1.04-1.07	0.0211893
RREB1	rs9379084	6:7231843	G	A	0.8873	0.1127	3.3x10-21	1.11	1.08-1.13	0.045323
SRGAP2	rs9430095	1:206593900	C	G	0.494	0.494	1.9x10-8	1.04	1.02-1.05	0.0170333
SLC35D3	rs9494624	6:137300960	A	G	0.2899	0.2899	6.1x10-9	1.04	1.03-1.06	0.0170333
RREB1	rs9505097	6:7255650	C	T	0.7994	0.2006	8.6x10-10	1.05	1.03-1.07	0.0211893
PCDH17	rs9537803	13:58366634	C	T	0.2771	0.2771	4.6x10-8	1.04	1.03-1.06	0.0170333
SRGAP2D	rs9563615	13:59077406	A	T	0.7101	0.2899	6.4x10-11	1.05	1.03-1.06	0.0211893
PCDH17	rs9569864	13:58965435	C	T	0.8247	0.1753	8.7x10-8	1.05	1.03-1.06	0.0211893
DLEU1	rs963740	13:51096095	A	T	0.7128	0.2872	2.1x10-8	1.04	1.03-1.05	0.0170333
ANKRD55	rs96844	5:56196604	G	A	0.2622	0.2622	5.4x10-8	1.04	1.03-1.05	0.0170333
ANKRD55	rs9687832	5:55861595	A	G	0.1975	0.1975	1.7x10-20	1.08	1.06-1.10	0.0334238
TMCC1	rs9828772	3:129333182	C	G	0.8983	0.1017	4.2x10-8	1.06	1.04-1.08	0.0253059
ADAMTS9	rs9860730	3:64701146	A	G	0.7036	0.2964	4.9x10-15	1.06	1.04-1.07	0.0253059
SLC2A2	rs9873618	3:170733076	G	A	0.71	0.29	4.8x10-21	1.07	1.05-1.08	0.0293838
GRP	rs9957145	18:56876228	G	A	0.829	0.171	8.1x10-9	1.05	1.03-1.07	0.0211893
